# Supplementary material
Source: PubMed Central journal article supplement (PMC3032479)
Supplement: pp.110.168435_1.pdf [file pp.110.168435_1.pdf]

# The roles of ATP synthase and the cytochrome *b<sub>6</sub>/f* complexes in limiting chloroplast electron transport and determining photosynthetic capacity

Wataru Yamori, Shunichi Takahashi, Amane Makino, Dean Price, Murray Badger and Susanne von Caemmerer

## Supplemental Figure Legends

### Fig. S1

CO<sub>2</sub> response of CO<sub>2</sub> assimilation rate (*A*) and electron transport rate (ETR) at 25°C. CO<sub>2</sub> response of CO<sub>2</sub> assimilation rate (*A*) measured at 25°C and 1200 μmol photons m<sup>-2</sup> s<sup>-1</sup> in anti-ATP synthase (δ) lines (A) or anti-Rieske FeS lines (B). Three groups were classified with respect to ATP synthase (δ) content or Rieske FeS content: Rieske FeS: WT (approximately 100%: circle), plants with intermediate Rieske FeS level (58~85%: triangle) and plants with low Rieske FeS level (27~29%: square); ATP synthase (δ): WT (approximately 100%), plants with intermediate ATP synthase (δ) level (48~75%) and plants with low ATP synthase (δ) level (22~26%). CO<sub>2</sub> assimilation rate at 380 μmol mol<sup>-1</sup> CO<sub>2</sub> concentration (*A*<sub>380</sub>) is shown as a solid symbol. CO<sub>2</sub> assimilation rate limited by RuBP carboxylation (*A<sub>c</sub>*: solid line) whereas CO<sub>2</sub> assimilation rate limited by RuBP regeneration (*A<sub>r</sub>*: dotted line). Curve fitting was described in the material and methods section. CO<sub>2</sub> response of the electron transport rate (ETR) from Chl fluorescence at 25°C at 1200 μmol photons m<sup>-2</sup> s<sup>-1</sup> in anti-ATP synthase (δ) lines (C) or anti-Rieske FeS lines (D). ETR at 380 μmol mol<sup>-1</sup> CO<sub>2</sub> concentration is shown as a solid symbol. Data represent means ±SE, n = 3~4.

### Fig. S2

CO<sub>2</sub> response of CO<sub>2</sub> assimilation rate (*A*) and electron transport rate (ETR) at 40°C. CO<sub>2</sub> response of CO<sub>2</sub> assimilation rate (*A*) measured at 40°C and 1200 μmol photons m<sup>-2</sup> s<sup>-1</sup> in anti-ATP synthase (δ) lines (A) or anti-Rieske FeS lines (B). Three groups were classified with respect to ATP synthase (δ) content or Rieske FeS content: wild type (circles), plants with intermediate contents of ATP synthase (δ) or Rieske FeS protein (triangles) and plants with low contents of ATP synthase (δ) or Rieske FeS protein (squares), as mentioned in Fig. S1. CO<sub>2</sub> assimilation rate at 380 μmol mol<sup>-1</sup> CO<sub>2</sub> concentration (*A*<sub>380</sub>) is shown as a solid symbol. CO<sub>2</sub> assimilation rate limited by RuBP carboxylation (*A<sub>c</sub>*: solid line) whereas CO<sub>2</sub> assimilation rate limited by RuBP regeneration (*A<sub>r</sub>*: dotted line). Curve fitting was described in the material and methods section. CO<sub>2</sub> response of the electron transport rate (ETR) from Chl fluorescence at 40°C at 1200 μmol photons m<sup>-2</sup> s<sup>-1</sup> in anti-ATP synthase (δ) lines (C) or anti-Rieske FeS lines (D). ETR at 380 μmol mol<sup>-1</sup> CO<sub>2</sub> concentration is shown as a solid symbol. Data represent means ±SE, n = 3~4.

**Fig. S3**

Rubisco activation state, Rubisco and Rubisco activase content. Content of Rubisco (A, B) and Rubisco activase (C, D), and Rubisco activation state (E, F) in antisense plants with a variety of  $\delta$  subunit of chloroplast ATP synthase (A, C & E) and in antisense plants with a variety of Rieske FeS contents (B, D & F). The contents of several photosynthetic components, including Rubisco and Rubisco activase, were similar among wild type, anti-Rieske FeS plants and anti-ATP synthase ( $\delta$ ) plants. The optimum temperature for  $A_{380}$  was  $32.3 \pm 0.4^\circ\text{C}$  in WT and was similar among WT, anti-Rieske FeS and anti-ATP synthase ( $\delta$ ). Rubisco activation state at  $40^\circ\text{C}$  decreased by 7~8% compared to  $25^\circ\text{C}$  in WT. Rubisco activation state declined only by approximately 10% at both 25 and  $40^\circ\text{C}$  in anti-ATP synthase ( $\delta$ ) plants with an ATP synthase ( $\delta$ ) content of less than 20% of wild-type. On the other hand, Rubisco activation state declined by approximately 20% both at 25 and  $40^\circ\text{C}$  in plants with Rieske FeS content lower than 20% of wild-type

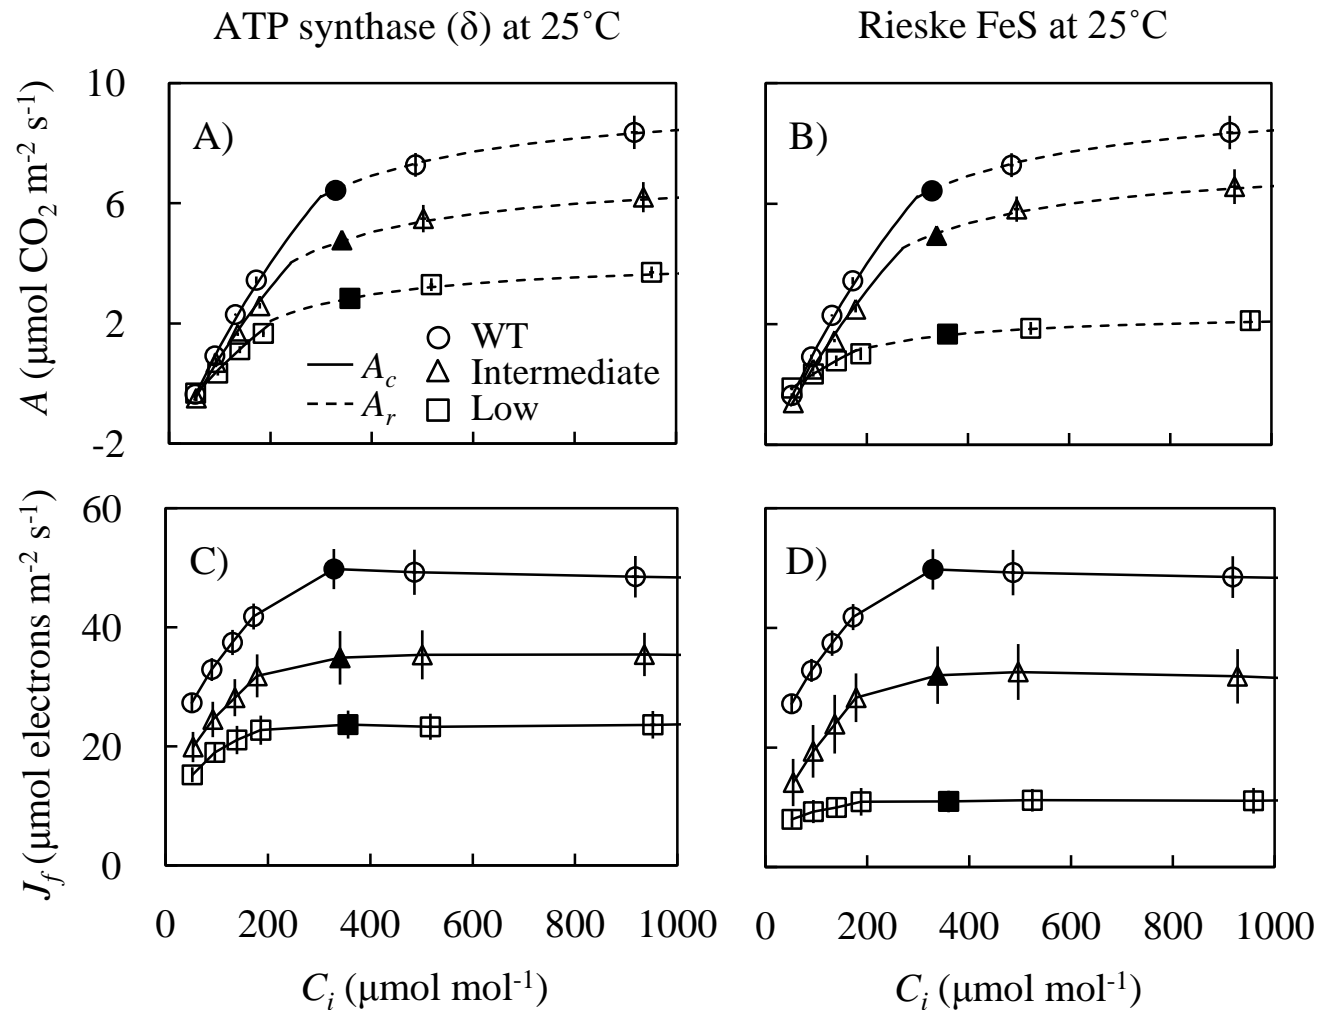

**Fig. S1**

CO<sub>2</sub> response of CO<sub>2</sub> assimilation rate ( $A$ ) and electron transport rate (ETR) at 25°C. CO<sub>2</sub> response of CO<sub>2</sub> assimilation rate ( $A$ ) measured at 25°C and 1200  $\mu\text{mol photons m}^{-2} \text{ s}^{-1}$  in anti-ATP synthase ( $\delta$ ) lines (A) or anti-Rieske FeS lines (B). Three groups were classified with respect to ATP synthase ( $\delta$ ) content or Rieske FeS content: Rieske FeS: WT (approximately 100%: circle), plants with intermediate Rieske FeS level (58~85%: triangle) and plants with low Rieske FeS level (27~29%: square); ATP synthase ( $\delta$ ): WT (approximately 100%), plants with intermediate ATP synthase ( $\delta$ ) level (48~75%) and plants with low ATP synthase ( $\delta$ ) level (22~26%). CO<sub>2</sub> assimilation rate at 380  $\mu\text{mol mol}^{-1}$  CO<sub>2</sub> concentration ( $A_{380}$ ) is shown as a solid symbol. CO<sub>2</sub> assimilation rate limited by RuBP carboxylation ( $A_c$ : solid line) whereas CO<sub>2</sub> assimilation rate limited by RuBP regeneration ( $A_r$ : dotted line). Curve fitting was described in the material and methods section. CO<sub>2</sub> response of the electron transport rate (ETR) from Chl fluorescence at 25°C at 1200  $\mu\text{mol photons m}^{-2} \text{ s}^{-1}$  in anti-ATP synthase ( $\delta$ ) lines (C) or anti-Rieske FeS lines (D). ETR at 380  $\mu\text{mol mol}^{-1}$  CO<sub>2</sub> concentration is shown as a solid symbol. Data represent means  $\pm$ SE,  $n = 3\sim 4$ .

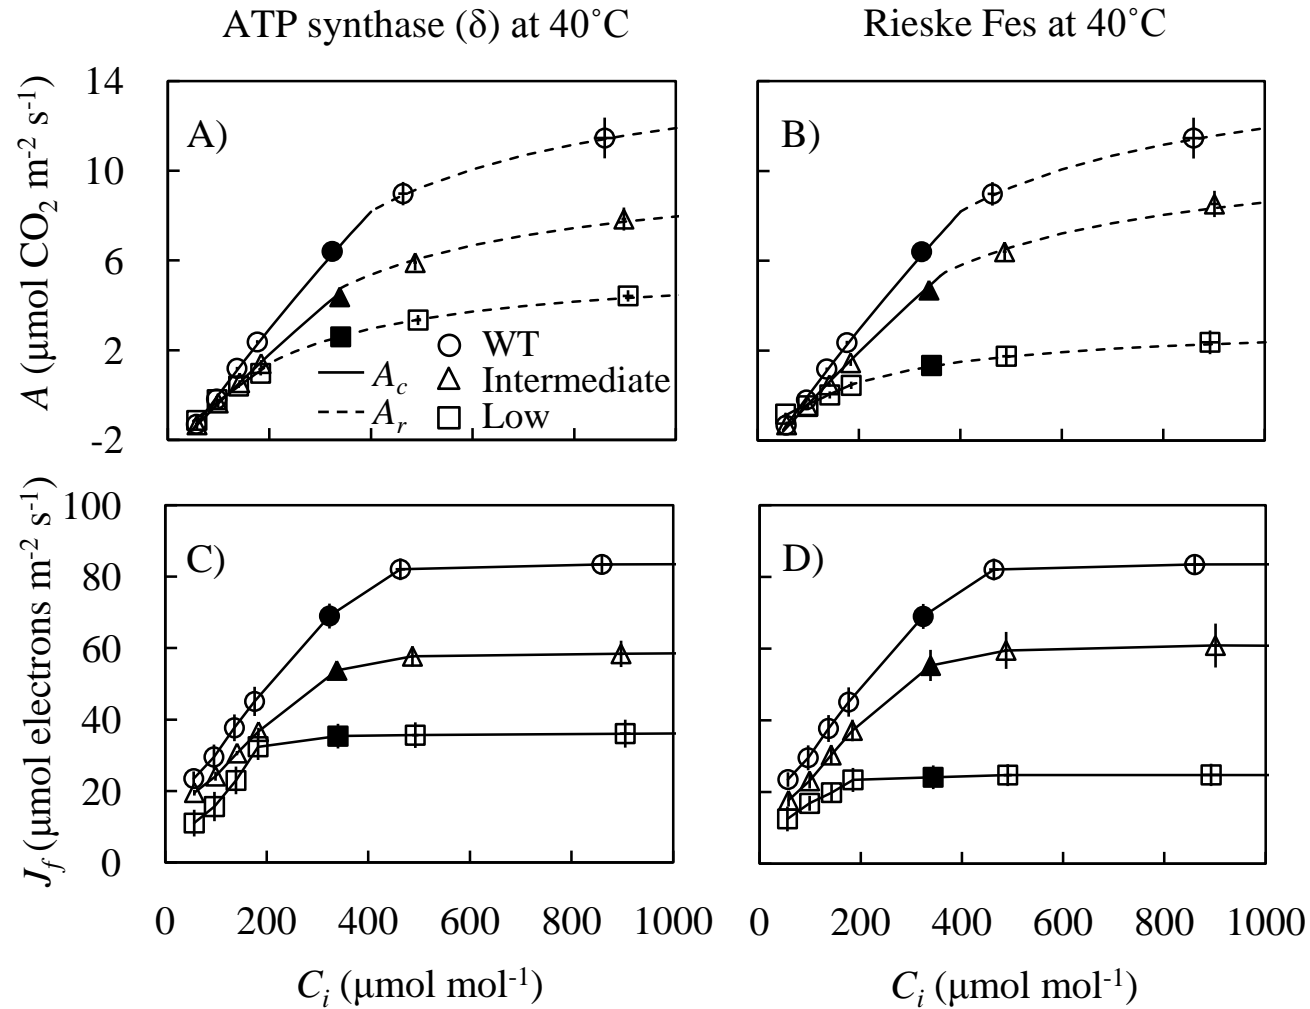

**Fig. S2**

CO<sub>2</sub> response of CO<sub>2</sub> assimilation rate ( $A$ ) and electron transport rate (ETR) at 40°C. CO<sub>2</sub> response of CO<sub>2</sub> assimilation rate ( $A$ ) measured at 40°C and 1200  $\mu\text{mol photons m}^{-2} \text{ s}^{-1}$  in anti-ATP synthase ( $\delta$ ) lines (A) or anti-Rieske FeS lines (B). Three groups were classified with respect to ATP synthase ( $\delta$ ) content or Rieske FeS content: wild type (circles), plants with intermediate contents of ATP synthase ( $\delta$ ) or Rieske FeS protein (triangles) and plants with low contents of ATP synthase ( $\delta$ ) or Rieske FeS protein (squares), as mentioned in Fig. S1. CO<sub>2</sub> assimilation rate at 380  $\mu\text{mol mol}^{-1}$  CO<sub>2</sub> concentration ( $A_{380}$ ) is shown as a solid symbol. CO<sub>2</sub> assimilation rate limited by RuBP carboxylation ( $A_c$ : solid line) was whereas CO<sub>2</sub> assimilation rate limited by RuBP regeneration ( $A_r$ : dotted line). Curve fitting was described in the material and methods section. CO<sub>2</sub> response of the electron transport rate (ETR) from Chl fluorescence at 40°C at 1200  $\mu\text{mol photons m}^{-2} \text{ s}^{-1}$  in anti-ATP synthase ( $\delta$ ) lines (C) or anti-Rieske FeS lines (D). ETR at 380  $\mu\text{mol mol}^{-1}$  CO<sub>2</sub> concentration is shown as a solid symbol. Data represent means  $\pm$  SE.  $n = 3\sim 4$ .

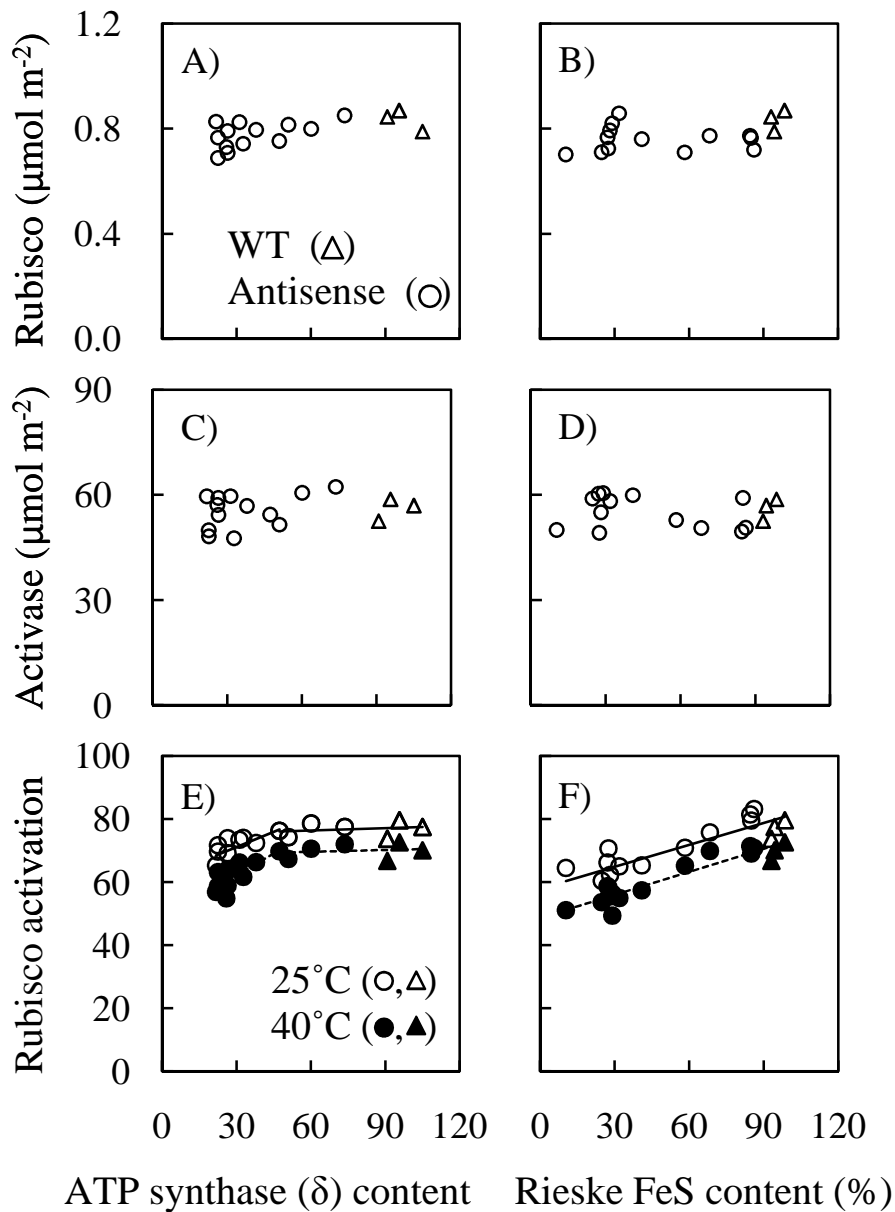

**Fig. S3**

Rubisco activation state, Rubisco and Rubisco activase content. Content of Rubisco (A, B) and Rubisco activase (C, D), and Rubisco activation state (E, F) in antisense plants with a variety of  $\delta$  subunit of chloroplast ATP synthase (A, C & E) and in antisense plants with a variety of Rieke FeS contents (B, D & F). The contents of several photosynthetic components, including Rubisco and Rubisco activase, were similar among wild type, anti-Rieske FeS plants and anti-ATP synthase ( $\delta$ ) plants. The optimum temperature for  $A_{380}$  was  $32.3 \pm 0.4^\circ\text{C}$  in WT and was similar among WT, anti-Rieske FeS and anti-ATP synthase ( $\delta$ ). Rubisco activation state at  $40^\circ\text{C}$  decreased by 7~8% compared to  $25^\circ\text{C}$  in WT. Rubisco activation state declined only by approximately 10% at both 25 and  $40^\circ\text{C}$  in anti-ATP synthase ( $\delta$ ) plants with an ATP synthase ( $\delta$ ) content of less than 20% of wild-type. On the other hand, Rubisco activation state declined by approximately 20% both at 25 and  $40^\circ\text{C}$  in plants with Rieske FeS content lower than 20% of wild-type.
